# Supplementary material for: Secreted IgM modulates IL-10 expression in B cells
Source: PubMed Central journal article supplement (PMC10773282; doi:10.1038/s41467-023-44382-w), 2024-01-05
Supplement: 41467_2023_44382_MOESM1_ESM.pdf [file 41467_2023_44382_MOESM1_ESM.pdf]

## Secreted IgM modulates IL-10 expression in B cells

**Authors:** Shannon Eileen McGettigan<sup>1</sup>, Lazaro Emilio Aira<sup>1</sup>, Gaurav Kumar<sup>2</sup>, Romain Ballet<sup>3,4</sup>, Eugene C. Butcher<sup>3,4</sup>, Nicole Baumgarth<sup>5,6</sup>, Gudrun F. Debes<sup>1,7\*</sup>

### **Affiliations:**

1. Department of Microbiology and Immunology, Sidney Kimmel Medical College, Thomas Jefferson University, Philadelphia, PA, 19107
2. Department of Cancer Biology, Sidney Kimmel Medical College, Thomas Jefferson University, Philadelphia, PA, 19107
3. Palo Alto Veterans Institute for Research, Veterans Affairs Palo Alto Health Care System, Palo Alto, CA, USA
4. Laboratory of Immunology and Vascular Biology, Department of Pathology, Stanford University School of Medicine, Stanford, CA, USA
5. Center for Immunology and Infectious Diseases, Dept. Pathology, Microbiology & Immunology, University of California Davis, Davis, CA, USA
6. Department of Molecular Microbiology and Immunology, Bloomberg School of Public Health, Johns Hopkins University, Baltimore, MD, USA
7. Sidney Kimmel Cancer Center, Thomas Jefferson University, Philadelphia, PA, 19107

\*Corresponding author: Dr. Gudrun F. Debes; Email: [Gudrun.debes@jefferson.edu](mailto:Gudrun.debes@jefferson.edu).

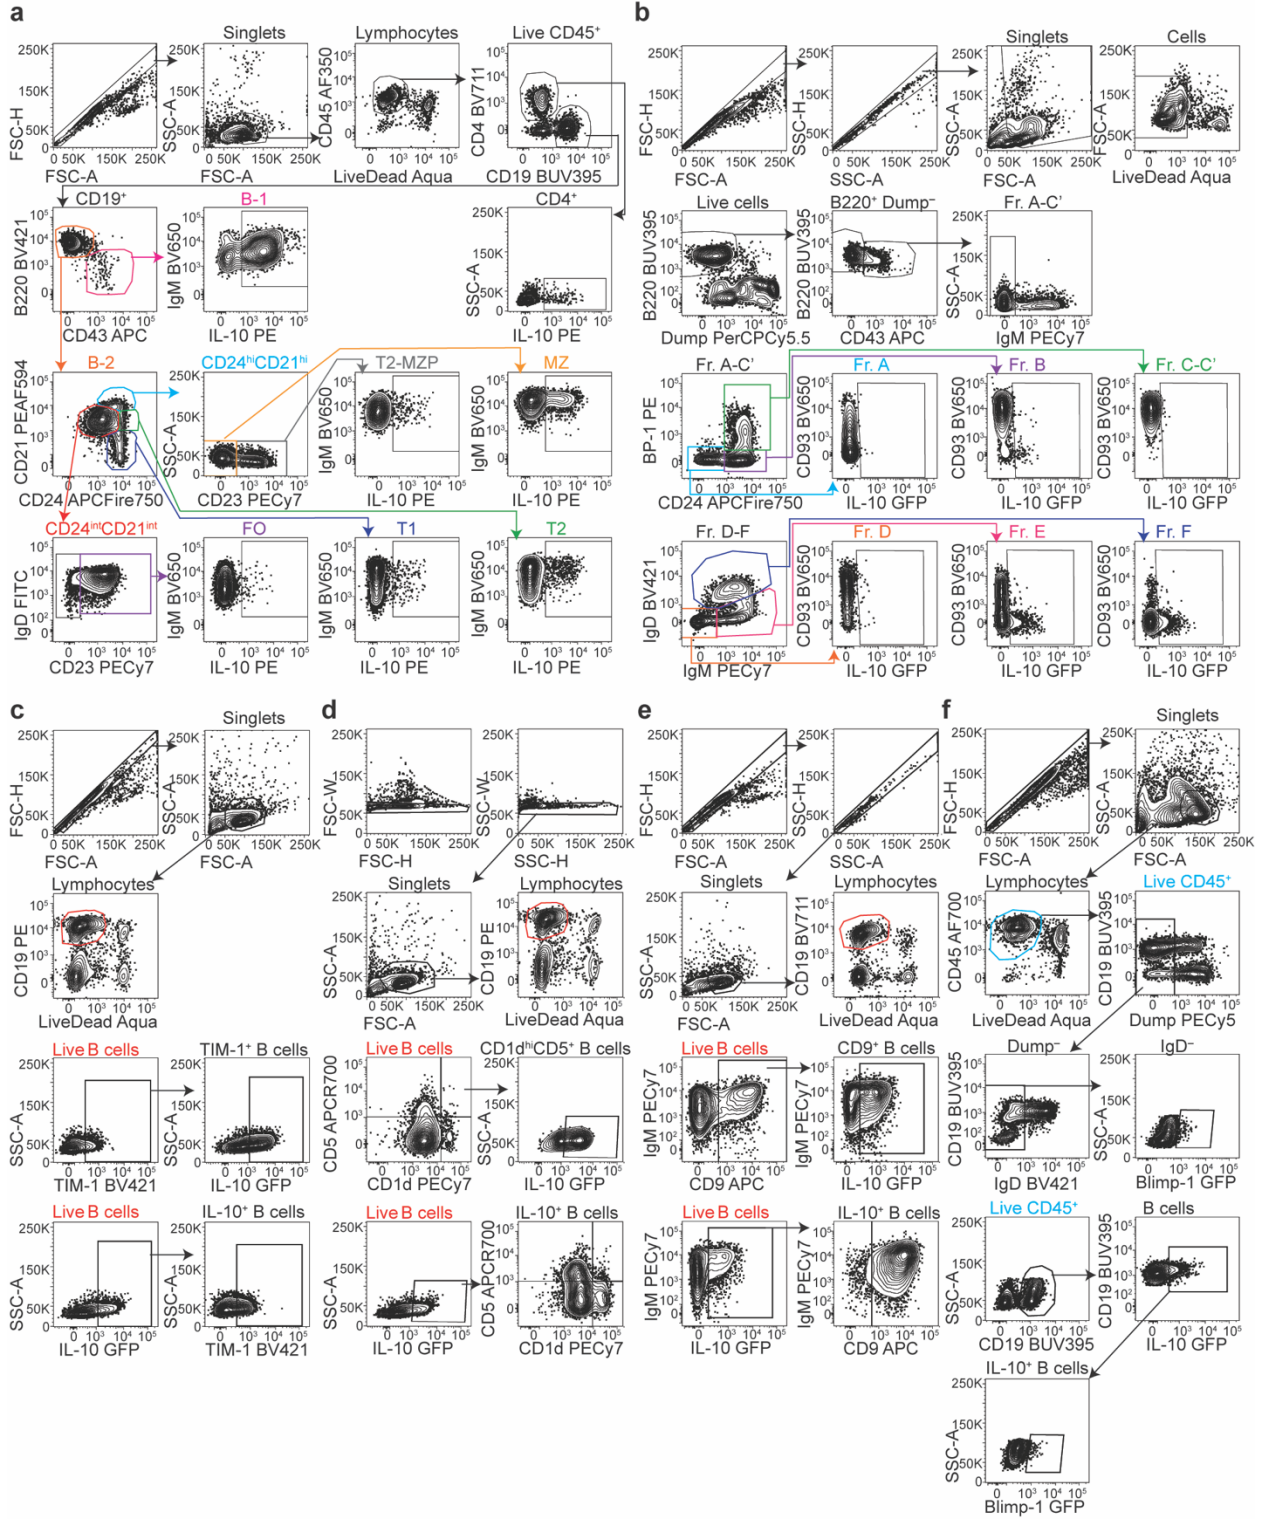

**Supplementary Figure 1. Gating strategy for B cell subsets, Bregs, plasma cells, and IL-10 expression.**

(a) Flow cytometric gating strategy for B cell subsets and IL-10 expression; related to Figures 1c-f; 2a; 4a-b, e-f, h-I; 5a-b and Supplementary Figures 2c-d; 5b-c. Cells were gated on singlets, lymphocytes, Live/Dead (L/D) stain<sup>-</sup>, CD45<sup>+</sup>, CD4<sup>-</sup>, CD19<sup>+</sup>, followed by markers specific to each B cell subset: B-1: B220<sup>lo/-</sup>CD43<sup>+</sup>; and B-2: B220<sup>hi</sup>CD43<sup>-</sup>; B-2 cells further subdivided as transitional-1 (T1): CD24<sup>hi</sup>CD21<sup>lo/-</sup>; transitional-2 (T2): CD24<sup>hi</sup>CD21<sup>int</sup>; transitional-2-marginal zone precursor (T2-MZP): CD24<sup>hi</sup>CD21<sup>hi</sup>, CD23<sup>+</sup>; marginal zone (MZ): CD24<sup>hi</sup>CD21<sup>hi</sup> CD23<sup>-</sup>; and follicular (FO): CD24<sup>int</sup>CD21<sup>int</sup> CD23<sup>+</sup>. CD4<sup>+</sup> T cells were gated on singlets, lymphocytes, L/D stain<sup>-</sup>, CD45<sup>+</sup>, CD4<sup>+</sup>, CD19<sup>-</sup>. Markers to delineate subsets were chosen based on those that retained expression equivalently with and without 4-h stimulation with phorbol 12-myristate 13-acetate/ionomycin/lipopolysaccharide (P/I/L). (b) Flow cytometric gating strategy for bone marrow (BM) developing B cells (Figure 2b) assessed after 4-h stimulation with P/I/L for B cell fractions according to the Hardy scheme. Cells were gated on singlets, Live/Dead (L/D) stain<sup>-</sup> CD3<sup>-</sup>F4/80<sup>-</sup>NK1.1<sup>-</sup>Gr-1<sup>-</sup>B220<sup>+</sup>. B220<sup>+</sup> BM cells were further subdivided into Hardy fractions: Fr. A: B220<sup>+</sup>CD43<sup>+</sup>IgM<sup>-</sup>BP1<sup>-</sup>CD24<sup>-</sup>; Fr. B: B220<sup>+</sup>CD43<sup>+</sup>IgM<sup>-</sup>BP1<sup>-</sup>CD24<sup>+</sup>; Fr. C-C': B220<sup>+</sup>CD43<sup>+</sup>IgM<sup>-</sup>BP1<sup>+</sup>CD24<sup>+</sup>; Fr. D: B220<sup>+</sup>CD43<sup>-</sup>IgM<sup>-</sup>IgD<sup>-</sup>; Fr. E: B220<sup>+</sup>CD43<sup>-</sup>IgM<sup>+</sup>IgD<sup>-</sup>; and Fr. F: B220<sup>+</sup>CD43<sup>-</sup>IgM<sup>+/+</sup>IgD<sup>+</sup>. (c-e) Flow cytometric gating strategy for splenic Breg markers Figures 2c-e. Breg phenotype identified by expression of TIM-1<sup>+</sup> (c), CD1d<sup>hi</sup>CD5<sup>+</sup> (d), or CD9<sup>+</sup> (e) among total splenic B cells without stimulation in sIgM<sup>-/-</sup>IL10<sup>GFP</sup> mice. (f) Flow cytometric gating strategy for Plasma cells (PC), Figure 2f, directly assessed *ex vivo* by L/D stain<sup>-</sup> CD45<sup>+</sup>CD3<sup>-</sup>F4/80<sup>-</sup>IgD<sup>-</sup>Blimp-1<sup>+</sup> lymphocytes using sIgM<sup>-/-</sup> mice crossed with Blimp1<sup>GFP</sup> reporter mice (left) and among IL-10<sup>+</sup> B cells after 4-h stimulation with P/I/L (right).

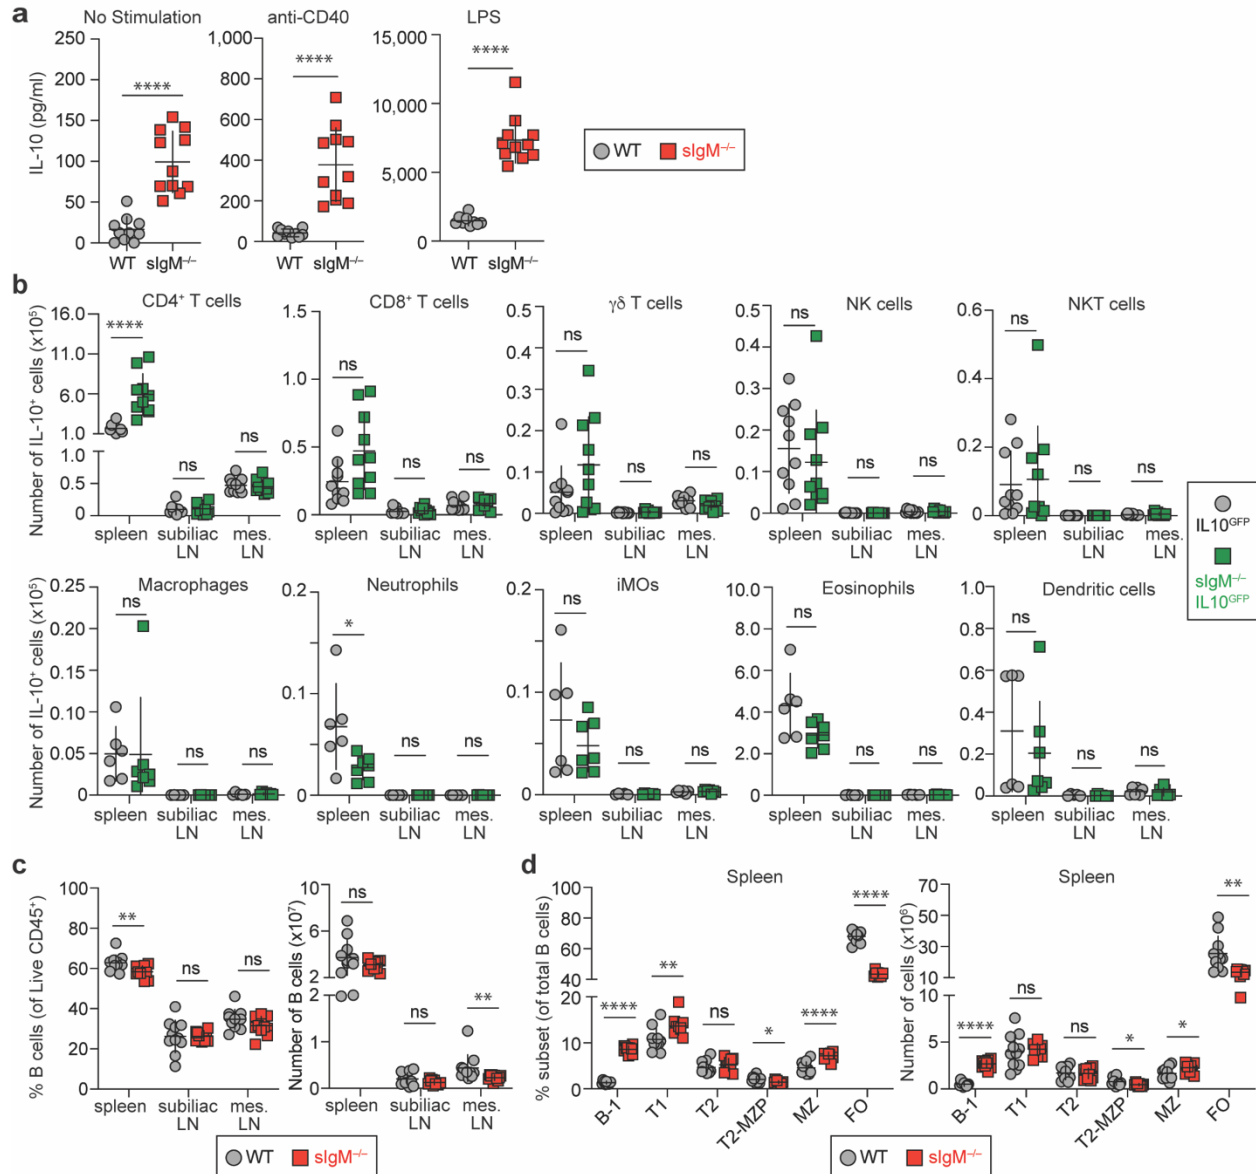

**Supplementary Figure 2. Leukocyte IL-10 expression and B cell subsets in *sIgM*<sup>-/-</sup> and WT mice.**

(a) IL-10 concentration by ELISA in B-cell culture supernatants after 3-day stimulation with 5  $\mu$ g/ml anti-CD40, 1  $\mu$ g/ml lipopolysaccharide (LPS), or without stimulation (Nil, WT n=10, *sIgM*<sup>-/-</sup> n=11, \*\*\*\*p<0.0001; anti-CD40, WT n=9, *sIgM*<sup>-/-</sup> n=11, \*\*\*\*p<0.0001). (b-d) Flow cytometric analysis of leukocyte subsets in spleen, subiliac lymph nodes, and mesenteric (mes.) lymph nodes (LN) of *sIgM*<sup>-/-</sup> and WT mice. (b) Frequency of IL-10<sup>+</sup> cells based on GFP

expression in non-stimulated samples among lymphocyte subsets: pregated on singlets, lymphocyte scatter, LiveDead<sup>-</sup> CD45<sup>+</sup> CD19<sup>-</sup> then subgated for CD4<sup>+</sup> T cells (CD3<sup>+</sup>NK1.1<sup>-</sup> CD4<sup>+</sup>CD8<sup>-</sup>), CD8<sup>+</sup> T cells (CD3<sup>+</sup>NK1.1<sup>-</sup>CD4<sup>-</sup>CD8<sup>+</sup>),  $\gamma\delta$  T cells (CD3<sup>+</sup>NK1.1<sup>-</sup> $\gamma\delta$  TCR<sup>+</sup>), NK cells (CD3<sup>-</sup>NK1.1<sup>+</sup>), NKT cells (CD3<sup>+</sup>NK1.1<sup>+</sup>), and myeloid/granulocyte subsets: pregated on singlets, cell scatter, LiveDead<sup>-</sup> CD45<sup>+</sup>CD19<sup>-</sup> then subgated on macrophages (F4/80<sup>+</sup>), neutrophils (F4/80<sup>-</sup>CD11b<sup>+</sup>Ly6G<sup>+</sup>Ly6C<sup>+</sup>), inflammatory monocytes (iMOs; F4/80<sup>-</sup>CD11b<sup>+</sup>Ly6G<sup>-</sup>Ly6C<sup>hi</sup>), eosinophils (F4/80<sup>-</sup>CD11b<sup>+</sup>Ly6G<sup>-</sup>Ly6C<sup>lo</sup>), and dendritic cells (F4/80<sup>-</sup>CD11c<sup>+</sup>). Lymphocyte subsets: Spleen WT n=10, sIgM<sup>-/-</sup> n=10, subiliac LN WT n=10, sIgM<sup>-/-</sup> n=10, mes. LN WT n=10, sIgM<sup>-/-</sup> n=10; CD4<sup>+</sup> T cells: Spleen \*\*\*\*p<0.0001, subiliac LN p=0.7197, mes. LN p=0.6992; CD8<sup>+</sup> T cells: Spleen p=0.0630, subiliac LN p=0.8421, mes. LN p=0.4813;  $\gamma\delta$  T cells: Spleen p=0.2475, subiliac LN p=0.4339, mes. LN p=0.0753; NK cells: Spleen p=0.4359, subiliac LN p=0.3967, mes. LN p=0.5919; NKT cells: Spleen p=0.6842, subiliac LN p=0.6490, mes. LN p=0.6842. Myeloid/granulocyte subsets: Spleen WT n=6, sIgM<sup>-/-</sup> n=7, subiliac LN WT n=5, sIgM<sup>-/-</sup> n=7, mes. LN WT n=6, sIgM<sup>-/-</sup> n=7; Macrophages: Spleen p=0.3660, subiliac LN p=0.5227, mes. LN p=0.5338; Neutrophils: Spleen \*p=0.0221, subiliac LN p=0.4167, mes. LN p>0.9999; Inflammatory Monocytes: Spleen p=0.5338, subiliac LN p=0.8674, mes. LN p=0.6282; Eosinophils: Spleen p=0.0734, subiliac LN p=0.2020, mes. LN p=0.3456; Dendritic cells: Spleen p=0.8357, subiliac LN p=0.8763, mes. LN p=0.5338. (c) Frequency (left, WT n=11, sIgM<sup>-/-</sup> n=11; Spleen \*\*p=0.0032, subiliac LN p=0.9487, mes. LN p=0.2169) and total number (right, WT n=11, sIgM<sup>-/-</sup> n=11; Spleen p=0.3653, subiliac LN p=0.3080, mes. LN \*\*p=0.0014) of B cells. (d) Frequency and total number of B-1, transitional-1 (T1), transitional-2 (T2), transitional-2 marginal zone precursor (T2-MZP), marginal zone (MZ), and follicular (FO) B cell subsets in the spleen after 4-h stimulation with P/I/L. Frequency,

left, WT n=11, sIgM<sup>-/-</sup> n=11, B-1 \*\*\*p=0.0002, T1 \*\*\*\*p<0.0001, T2 \*\*\*\*p<0.0001, T2-MZP \*\*\*\*p<0.0001, MZ \*\*\*\*p<0.0001, FO \*\*\*\*p<0.0001 and Total Number, right, WT n=11, sIgM<sup>-/-</sup> n=11, B-1 \*\*\*\*p<0.0001, T1 \*\*\*\*p<0.0001, T2 \*\*\*\*p<0.0001, T2-MZP \*\*\*\*p<0.0001, MZ \*\*\*\*p<0.0001, FO \*\*\*\*p<0.0001. Negligible differences in lymphocyte subset frequencies were noted after 4-h stimulation. Data points indicate mean ± SD and each symbol represents one mouse. P values were calculated using two-tailed Mann-Whitney U test. Data are pooled from 2 (b: myeloid/granulocyte subsets), 3 (b: lymphoid subsets; c; d) or 5(a) independent experiments. Not significant (ns). Source data are provided with this paper.

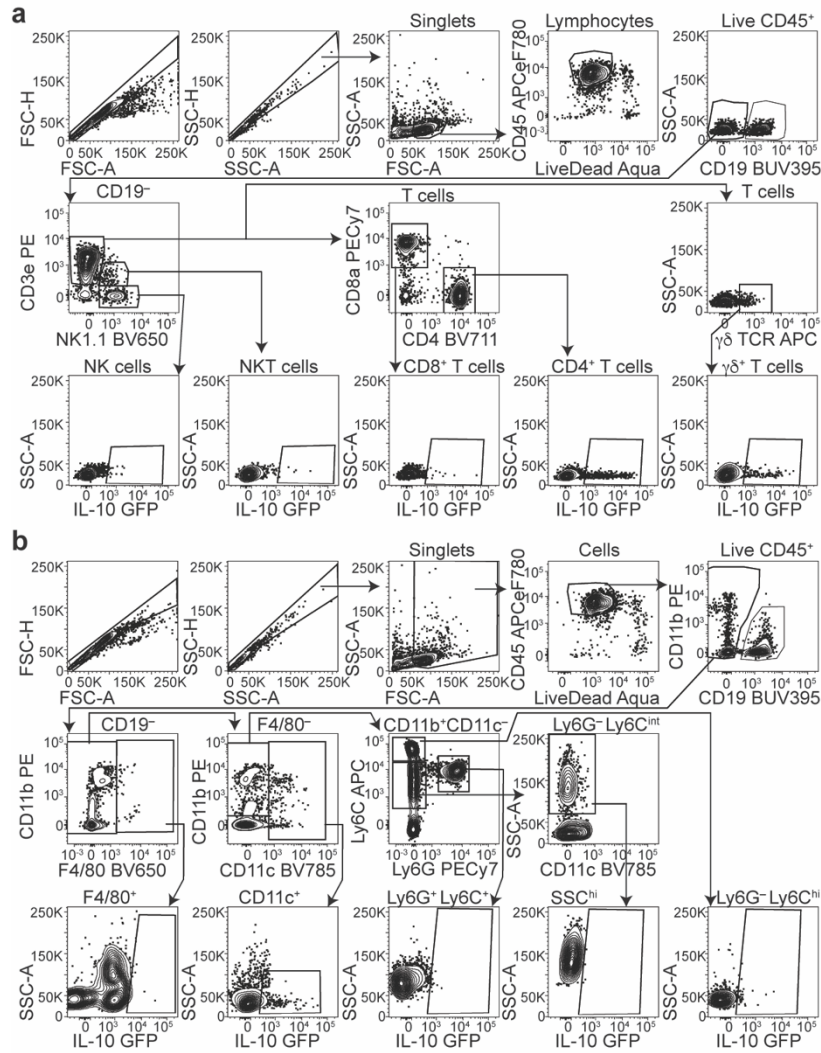

**Supplementary Figure 3. Gating strategy for non-B cell leukocytes.**

Gating strategy for non-B cell leukocytes; related to Supplementary Figure 2b. (a) Frequency of IL-10<sup>+</sup> cells based on GFP expression in non-stimulated samples among lymphocyte subsets: pregated on singlets, lymphocyte scatter, LiveDead<sup>-</sup> CD45<sup>+</sup> CD19<sup>-</sup> then subgated for CD4<sup>+</sup> T cells (CD3<sup>+</sup>NK1.1<sup>-</sup>CD4<sup>+</sup>CD8<sup>-</sup>), CD8<sup>+</sup> T cells (CD3<sup>+</sup>NK1.1<sup>-</sup>CD4<sup>+</sup>CD8<sup>+</sup>),  $\gamma\delta$  T cells (CD3<sup>+</sup>NK1.1<sup>-</sup> $\gamma\delta$  TCR<sup>+</sup>), NK cells (CD3<sup>-</sup>NK1.1<sup>+</sup>), NKT cells (CD3<sup>+</sup>NK1.1<sup>+</sup>). (b) Frequency of IL-10<sup>+</sup> cells based on GFP expression in non-stimulated samples among myeloid/granulocyte subsets: pregated on singlets, cell scatter, LiveDead<sup>-</sup> CD45<sup>+</sup>CD19<sup>-</sup> then subgated on macrophages (F4/80<sup>+</sup>), neutrophils (F4/80<sup>-</sup>CD11b<sup>+</sup>Ly6G<sup>+</sup>Ly6C<sup>+</sup>), inflammatory monocytes

(iMOs; F4/80<sup>-</sup>CD11b<sup>+</sup>Ly6G<sup>-</sup>Ly6C<sup>hi</sup>), eosinophils (F4/80<sup>-</sup>CD11b<sup>+</sup>Ly6G<sup>-</sup>Ly6C<sup>lo</sup>), and dendritic cells (F4/80<sup>-</sup>CD11c<sup>+</sup>).



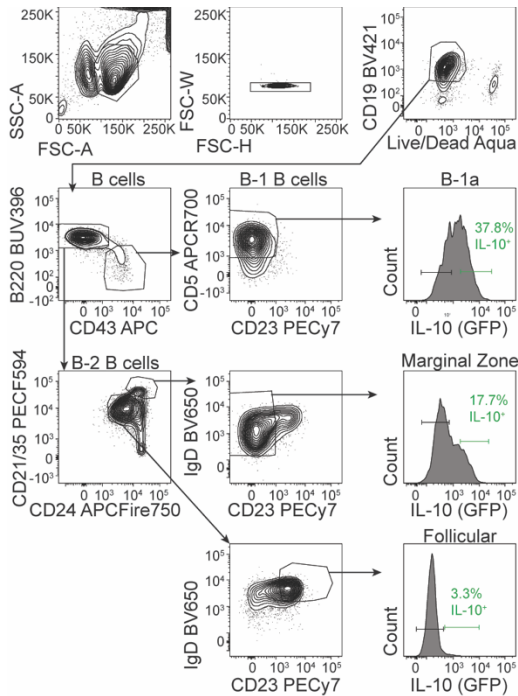

**Supplementary Figure 4. FACS sorting gating strategy for IL-10<sup>+</sup> and IL-10<sup>-</sup> B-1a, MZ, and FO B cell subsets for clonotype analysis.**

Flow cytometric gating strategy for IL-10<sup>+</sup> (GFP<sup>+</sup>) and IL-10<sup>-</sup> (GFP<sup>-</sup>) sIgM<sup>-/-</sup> B cells based on GFP expression in B-1a, MZ, and FO B cell subsets; related to Figure 3. GFP<sup>+</sup> cells determined using GFP<sup>-</sup> sIgM<sup>-/-</sup> mice. Subsets were gated on singlets, lymphocytes, Live/Dead (L/D) stain<sup>-</sup>, CD45<sup>+</sup>, CD4<sup>neg</sup>, CD19<sup>+</sup>, followed by markers specific to each B cell subset: B-1a: B220<sup>lo/-</sup> CD43<sup>+</sup>CD5<sup>+</sup>; marginal zone (MZ): B220<sup>hi</sup>CD43<sup>-</sup>CD24<sup>hi</sup>CD21<sup>hi</sup>CD23<sup>-</sup>; and follicular (FO): B220<sup>hi</sup>CD43<sup>-</sup>CD24<sup>int</sup>CD21<sup>int</sup>CD23<sup>+</sup>.

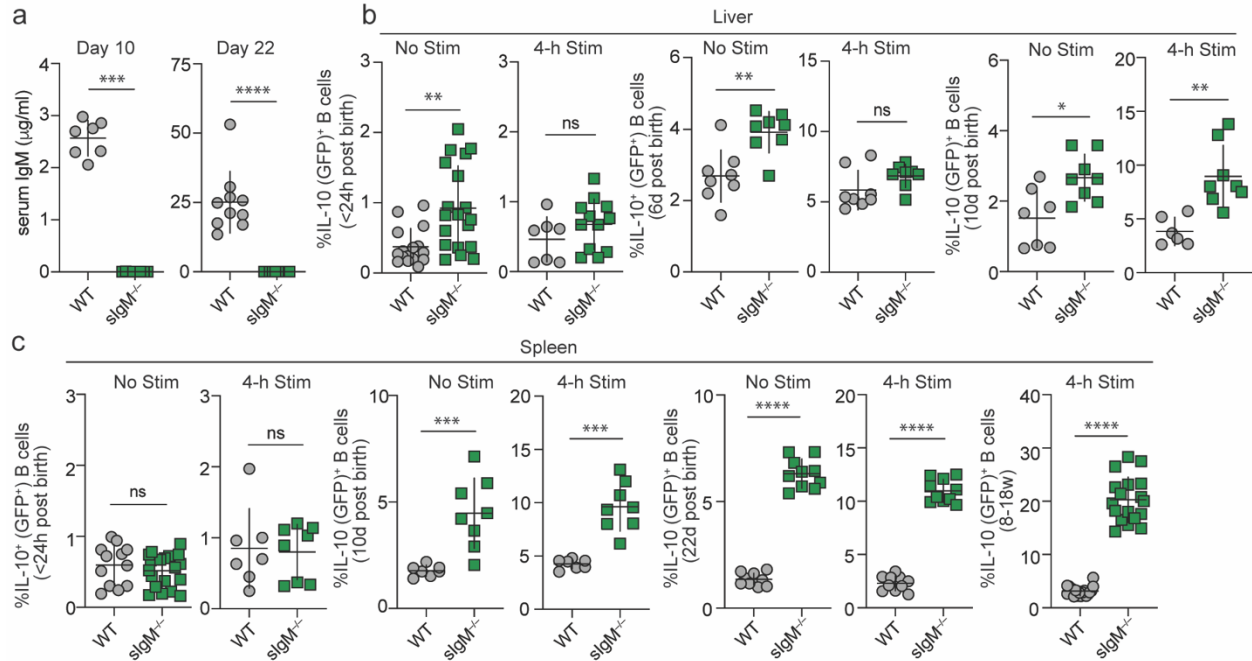

**Supplementary Figure 5. The expansion of IL-10<sup>+</sup> B cells in the absence of sIgM appears perinatally.**

(a) Serum IgM concentration in WT and sIgM<sup>-/-</sup> mice at day 10 and 22 (weaning age) post birth determined by ELISA (day 10, WT n=7, sIgM<sup>-/-</sup> n=8, \*\*\*p=0.0003; day 22 WT n=10, sIgM<sup>-/-</sup> n=10, \*\*\*\*p<0.0001). (b) Flow cytometric analysis of liver IL-10<sup>+</sup> B cells with and without 4-h stimulation with phorbol 12-myristate 13-acetate/ionomycin/lipopolysaccharide (P/I/L) at <24h, d6, and d10 post birth in WT and sIgM<sup>-/-</sup> mice (<24h, No Stim: WT n=16, sIgM<sup>-/-</sup> n=19 \*\*p=0.0018, 4h Stim: WT n=7, sIgM<sup>-/-</sup> n=12 p=0.0953, \*\*\*p=0.0003; day 6, No Stim: WT n=8, sIgM<sup>-/-</sup> n=8, \*\*p<0.0075, 4h Stim: WT n=8, sIgM<sup>-/-</sup> n=8 p=0.1848; day 10, No Stim: WT n=7, sIgM<sup>-/-</sup> n=8 \*p=0.0200, 4h Stim: WT n=7, sIgM<sup>-/-</sup> n=8 \*\*p=0.0013). (c) Flow cytometric analysis of splenic IL-10<sup>+</sup> B cells with and without 4-h stimulation with P/I/L at d10 and d22 (weaning) post birth and in adult WT and sIgM<sup>-/-</sup> mice (<24h, No Stim: WT n=12, sIgM<sup>-/-</sup> n=19 p=0.3011, 4h Stim: WT n=7, sIgM<sup>-/-</sup> n=12 p=0.0953, p=0.7789; day 6, No Stim: WT n=7, sIgM<sup>-/-</sup> n=8, \*\*\*p<0.0003, 4h Stim: WT n=8, sIgM<sup>-/-</sup> n=8 \*\*\*p=0.0002; day 10, No Stim: WT n=7,

sIgM<sup>-/-</sup> n=8 \*\*\*p=0.0006, 4h Stim: WT n=7, sIgM<sup>-/-</sup> n=8 \*\*\*p=0.0003; day 22, No Stim: WT n=10, sIgM<sup>-/-</sup> n=10 \*\*\*\*p<0.0001, 4h Stim: WT n=10, sIgM<sup>-/-</sup> n=10 \*\*\*\*p<0.0001; 8-18 weeks, No Stim: WT n=27, sIgM<sup>-/-</sup> n=27 \*\*\*\*p<0.0001, 4h Stim: WT n=18, sIgM<sup>-/-</sup> n=18 \*\*\*\*p<0.0001). Data points indicate mean ± SD and each symbol represents one mouse. P values were calculated using two-tailed Mann-Whitney U test. Data are pooled from 2 (a; b: 6 and 10 days; c: <24h stim, 10 and 22 days no stim and stim), 3 (b: <24h stim), or 4 (b: <24h no stim; c: <24h no stim) independent experiments. Not significant (ns). Source data are provided with this paper.

**Supplementary Table 1.** Antibodies used in this study.

| <b>Flow Cytometry</b>             |                    |                |                |              |                 |
|-----------------------------------|--------------------|----------------|----------------|--------------|-----------------|
| <b>Antibody</b>                   | <b>Fluorophore</b> | <b>Company</b> | <b>Catalog</b> | <b>Clone</b> | <b>Dilution</b> |
| anti-mouse CD16/32                | n/a                | BioXCell       | 2.4G2          | 2.4G2        | 1:12            |
| Fixable Live/Dead Fluorescent Dye | Aqua               | ThermoFisher   | L34966         | n/a          | 1:120           |
| anti-mouse BP-1 (CD249)           | PE                 | ThermoFisher   | 12-5891-82     | 6C3          | 1:25            |
| anti-mouse CD1d                   | PECy7              | Biologend      | 123523         | 1B1          | 1:400           |
| anti-mouse CD3e                   | Biotin             | eBioscience    | 13-0031-82     | 145-2C11     | 1:100           |
| anti-mouse CD3e                   | PE                 | eBioscience    | 12-0031-82     | 145-2C11     | 1:200           |
| anti-mouse CD3e                   | PECy5              | Biologend      | 100309         | 145-2C11     | 1:200           |
| anti-mouse CD4                    | BV711              | BD Biosciences | 563726         | RM4-5        | 1:800           |
| anti-mouse CD5                    | APC                | eBioscience    | 17-0051-80     | 53-7.3       | 1:400           |
| anti-mouse CD5                    | APCR700            | BD Biosciences | 565505         | 53-7.3       | 1:100           |
| anti-mouse CD5                    | Biotin             | BD Biosciences | 553018         | 53-7.3       | 1:400           |
| anti-mouse CD5                    | PE                 | eBioscience    | 12-0051-82     | 53-7.3       | 1:600           |
| anti-mouse CD8a                   | PECy7              | eBioscience    | 25-0081-82     | 53-7.3       | 1:400           |
| anti-mouse CD9                    | APC                | Biologend      | 124810         | MZ3          | 1:100           |
| anti-mouse CD9                    | FITC               | Biologend      | 124808         | MZ3          | 1:100           |
| anti-mouse CD11b                  | PE                 | eBioscience    | 12-0112-82     | M1/70        | 1:400           |
| anti-mouse CD11b                  | Pacific Blue       | Biologend      | 101224         | M1/70        | 1:200           |
| anti-mouse CD11c                  | BV785              | Biologend      | 117335         | N418         | 1:100           |
| anti-mouse CD19                   | BV421              | BD Biosciences | 562701         | 1D3          | 1:800           |
| anti-mouse CD19                   | BUV395             | BD Biosciences | 563557         | 1D3          | 1:800           |
| anti-mouse CD19                   | BV711              | BD Biosciences | 563157         | 1D3          | 1:300           |
| anti-mouse CD19                   | PE                 | eBioscience    | 12-0193-82     | 1D3          | 1:400           |
| anti-mouse CD19                   | Biotin             | eBioscience    | 13-0193-82     | 1D3          | 1:100           |
| anti-mouse CD19                   | AF647              | eBioscience    | 51-0193-82     | 1D3          | 1:300           |
| anti-mouse CD21/35                | PECF594            | BD Biosciences | 563959         | 7G6          | 1:800           |
| anti-mouse CD23                   | PECy7              | eBioscience    | 25-0232-82     | B3B4         | 1:200           |
| anti-mouse CD24                   | APCFire750         | Biologend      | 101839         | M1/69        | 1:200           |
| anti-mouse CD43                   | APC                | BD Biosciences | 560663         | S7           | 1:300           |
| anti-mouse CD43                   | FITC               | BD Biosciences | 553270         | S7           | 1:200           |

|                            |            |                |            |         |       |
|----------------------------|------------|----------------|------------|---------|-------|
| anti-mouse CD43            | PerCPCy5.5 | BD Biosciences | 562865     | S7      | 1:200 |
| anti-mouse CD45R/B220      | BUV395     | BD Biosciences | 563793     | RA3-6B2 | 1:200 |
| anti-mouse CD45R/B220      | BV421      | Biolegend      | 103240     | RA3-6B2 | 1:200 |
| anti-mouse CD45R/B220      | PECy5.5    | eBioscience    | 35-0452-82 | RA3-6B2 | 1:200 |
| anti-mouse CD45R/B220      | APCH7      | BD Biosciences | 565371     | RA3-6B2 | 1:200 |
| anti-mouse CD45            | AF350      | R&D Systems    | FAB114U    | 30-F11  | 1:200 |
| anti-mouse CD45            | AF700      | Biolegend      | 103128     | 30-F11  | 1:200 |
| anti-mouse CD45            | APCeF780   | eBioscience    | 47-0451-82 | 30-F11  | 1:500 |
| anti-mouse CD45.1          | PE         | eBioscience    | 12-0453-82 | A20     | 1:400 |
| anti-mouse CD45.1          | eF450      | eBioscience    | 48-0453-82 | A20     | 1:200 |
| anti-mouse CD45.2          | PECy5.5    | eBioscience    | 45-0454-82 | 104     | 1:200 |
| anti-mouse CD93            | BV650      | BD Biosciences | 563807     | AA4.1   | 1:100 |
| anti-mouse CD138           | BV421      | BD Biosciences | 566289     | 281-2   | 1:400 |
| anti-mouse CD138           | BV711      | BD Biosciences | 563193     | 281-2   | 1:100 |
| anti-mouse F4/80           | Biotin     | eBioscience    | 13-4801-82 | BM8     | 1:100 |
| anti-mouse F4/80           | PECy5      | Biolegend      | 123112     | BM8     | 1:100 |
| anti-mouse F4/80           | BV650      | Biolegend      | 123419     | BM8     | 1:200 |
| anti-mouse gamma delta TCR | APC        | eBioscience    | 17-5711-82 | GL3     | 1:400 |
| anti-mouse Gr-1            | PerCPCy5.5 | BD Biosciences | 552093     | RB6-8C5 | 1:200 |
| anti-mouse IgD             | FITC       | eBioscience    | 11-5993-82 | 11-26c  | 1:200 |
| anti-mouse IgD             | PE         | eBioscience    | 12-5993-83 | 11-26c  | 1:400 |
| anti-mouse IgD             | eF450      | eBioscience    | 48-5993-82 | 11-26c  | 1:200 |
| anti-mouse IgD             | BV650      | Biolegend      | 405721     | 11-26c  | 1:800 |
| anti-mouse IgD             | AF647      | eBioscience    | 51-5993-82 | 11-26c  | 1:400 |
| anti-mouse IgG1            | PerCPCy5.5 | Biolegend      | 406612     | RMG1-1  | 1:400 |
| anti-mouse IgG1            | PE         | Biolegend      | 406608     | RMG1-1  | 1:800 |
| anti-mouse IgM             | PE         | eBioscience    | 12-5790-82 | II/41   | 1:300 |
| anti-mouse IgM             | BV650      | BD Biosciences | 743326     | II/41   | 1:100 |
| anti-mouse IgM             | PECy7      | eBioscience    | 25-5790-82 | II/41   | 1:200 |
| anti-mouse IgMa            | BUV395     | BD Biosciences | 743891     | DS-1    | 1:200 |
| anti-mouse IgMa            | FITC       | BD Biosciences | 553516     | DS-1    | 1:200 |

|                     |                    |                |                |              |                                            |
|---------------------|--------------------|----------------|----------------|--------------|--------------------------------------------|
| anti-mouse IgMb     | PE                 | BD Biosciences | 553521         | AF6-78       | 1:200                                      |
| anti-mouse IgMb     | BV785              | BD Biosciences | 742348         | AF6-78       | 1:200                                      |
| anti-mouse IgMb     | Biotin             | Biolegend      | 406204         | AF6-78       | 1:800                                      |
| anti-mouse IL-10    | PE                 | eBioscience    | 12-7101-82     | JES5-16E     | 1:100                                      |
| anti-mouse IL-10    | BV421              | Biolegend      | 505022         | JES5-16E     | 1:100                                      |
| anti-mouse IL-10    | APC                | eBioscience    | 554468         | JES5-16E     | 1:100                                      |
| anti-mouse Ly6C     | APC                | Biolegend      | 128016         | HK1.4        | 1:400                                      |
| anti-mouse Ly6G     | PECy7              | Biolegend      | 127618         | HK1.4        | 1:400                                      |
| anti-mouse NK1.1    | Biotin             | Biolegend      | 108703         | PK136        | 1:200                                      |
| anti-mouse NK1.1    | BV650              | BD Biosciences | 564143         | PK136        | 1:200                                      |
| anti-mouse TIM-1    | BV421              | BD Biosciences | 566336         | RMT1-4       | 1:100                                      |
| anti-mouse TIM-1    | PE                 | Biolegend      | 119506         | RMT1-4       | 1:100                                      |
| anti-mouse IgG2b    | PE                 | Biolegend      | 400636         | RTK4530      | 1:100                                      |
| anti-mouse IgG2b    | BV421              | Biolegend      | 400640         | RTK4530      | 1:100                                      |
| anti-mouse IgG2b    | APC                | eBioscience    | 17-4031-82     | eB149/10H5   | 1:100                                      |
| Streptavidin        | PerCPCy5.5         | BD Biosciences | 551419         | n/a          | 1:200                                      |
| Streptavidin        | BV650              | Biolegend      | 405231         | n/a          | 1:400                                      |
| Streptavidin        | BV785              | Biolegend      | 405249         | n/a          | 1:400                                      |
|                     |                    |                |                |              |                                            |
| <b>ELISA</b>        |                    |                |                |              |                                            |
| <b>Antibody</b>     | <b>Fluorophore</b> | <b>Company</b> | <b>Catalog</b> | <b>Clone</b> | <b>Dilution</b>                            |
| goat-anti-mouse IgM | n/a                | Bethyl Labs    | A90-101A       | polyclonal   | 1:100                                      |
| IgM Standard        | n/a                | ThermoFisher   | 39-50470-65    | --           | as directed by manufacturer (lot specific) |
| goat-anti-mouse IgM | HRP                | Bethyl Labs    | A90-101P       | polyclonal   | 1:12,500                                   |
| IL-10 Mouse DuoSet  | n/a                | R&D Systems    | DY417-05       | --           | as directed by manufacturer (lot specific) |
