# Supplementary material for: Secreted IgM modulates IL-10 expression in B cells
Source: PubMed Central journal article supplement (PMC10773282; doi:10.1038/s41467-023-44382-w), 2024-01-05
Supplement: 41467_2023_44382_MOESM3_ESM.pdf [file 41467_2023_44382_MOESM3_ESM.pdf]

## Description of Additional Supplementary Files

File Name: Supplementary Data 1

Description: All VJ light chain clonotypes identified from IL-10<sup>+</sup> and IL-10<sup>-</sup> B-1a, marginal zone (MZ), and follicular (FO) B cell subsets from spleens of  $\text{slgM}^{-/-}\text{IL-10}^{\text{GFP}}$  mice.
